# Supplementary material for: MicroRNA-23a promotes pancreatic cancer metastasis by targeting epithelial splicing regulator protein 1
Source: PubMed Central journal article supplement (PMC5669934; doi:10.18632/oncotarget.20692), 2017-08-24
Supplement: oncotarget-08-82854-s001.pdf [file oncotarget-08-82854-s001.pdf]

# MicroRNA-23a promotes pancreatic cancer metastasis by targeting epithelial splicing regulator protein 1

## SUPPLEMENTARY MATERIALS

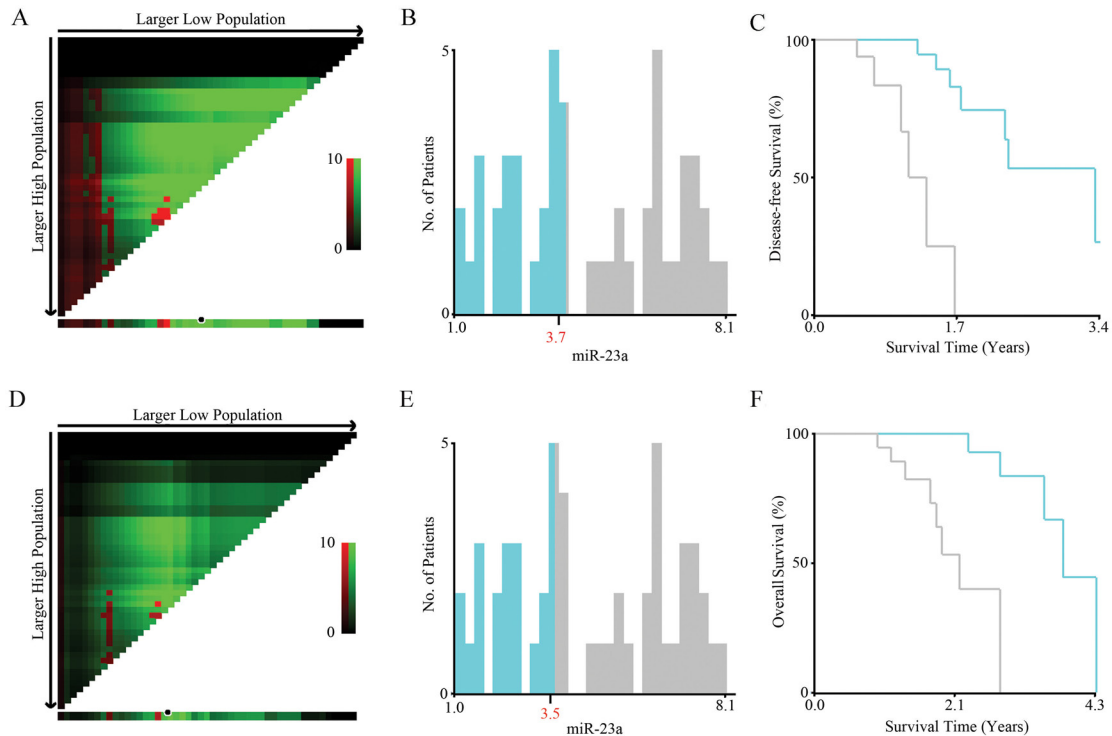

**Supplementary Figure 1: X-tile analysis of survival data in pancreatic cancer patients reveals a continuous distribution based on miR-23a expression levels.** The plot shows the  $\chi^2$  log-rank values produced when dividing the cohort with one cut-point, producing low and high subsets. The Y-axis represents cut-points from high to low (top to bottom) that defines a high subset, whereas the X-axis represents all potential cut-points from low to high (left to right) that defines a low subset. The optimal cut-point highlighted by the black circle in A and D is shown on a histogram of the entire cohort (B and E, for DFS and OS respectively), and a Kaplan-Meier plot (C and F, for DFS and OS respectively).

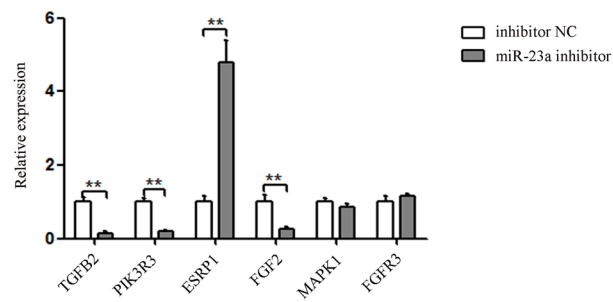

**Supplementary Figure 2: miR-23a down-regulation increased the expression of ESRP1 mRNA level in Panc-1 cells after transfecting with the miR-23a inhibitor.** The Panc-1 cells were transfected with miR-23a inhibitor or inhibitor NC. Next, the expression levels of TGFB2, PIK3R3, FGF2, ESRP1, MAPK1 and FGFR3 mRNA were determined by qRT-PCR.

Supplementary Table 1: The primers for PCR

| Primer name                  | Primer sequence                                 |
|------------------------------|-------------------------------------------------|
| miR-23a Fwd                  | 5'- ATCACATTGCCAGGGATTTC -3'                    |
| U6 Fwd                       | 5'-TGCGGGTGCTCGCTTCGGCAGC -3'                   |
| ESRP1 Fwd                    | 5'- CTGCTGTTCTGGAAAGTCGTGGAT-3'                 |
| ESRP1 Rev                    | 5'- GGTAAACTGTCGGAGGGCTTGG-3'                   |
| $\beta$ -actin Fwd (qRT-PCR) | 5'- CTCCATCCTGGCCTCGCTGT-3'                     |
| $\beta$ -actin Rev (qRT-PCR) | 5'- GCTGTCACCTTCACCGTTCC-3'                     |
| wt-ESRP1 3'UTR Fwd           | 5'-AGGCGATCGCTCGAGAAGAAAATTCTAGCAAATTCAGG -3'   |
| wt-ESRP1 3'UTR Rev           | 5'-ATTCCCGGGCTCGAGTTGAGATTAAACAGGCAAGTTTTAT -3' |
| mut-ESRP1 3'UTR-1            | 5' - ACATCTGATTCCAAATTAATGCCTATTTGCAATCAGC-3'   |
| mut-ESRP1 3'UTR-2            | 5'- TTTGGAATCAGATGTCTCCATT -3'                  |
| FGFR2-IIIb Fwd               | 5'- GATAAATAGTTCCAATGCAGAAGTGCT -3'             |
| FGFR2-IIIb Rev               | 5'- TGCCCTATATAATTGGAGACCTTACA -3'              |
| FGFR2-IIIc Fwd               | 5'-GTGCTTGGCGGGTAATTCTA-3'                      |
| FGFR2-IIIc Rev               | 5'-GCTGAAGTCTGGCTTCTTGG-3'                      |
| E-cadherin Fwd               | 5'-A ACAGGATGGCTGAAGGTGA-3'                     |
| E-cadherin Rev               | 5'-CCTTCCATGACAGACCCCTT-3'                      |
| N-cadherin Fwd               | 5'-ATATTTCCATCCTGCGCGTG-3'                      |
| N-cadherin Rev               | 5'-GTTTGGCCTGGCGTTCTTTA-3'                      |
| Vimentin Fwd                 | 5'-GAGAGGAAGCCGAAAACACC-3'                      |
| Vimentin Rev                 | 5'-TTCCTGAATCTGAGCCTGCA-3'                      |
| FOXO4 Fwd                    | 5'-TAGCACCACCTCCAGTCATG-3'                      |
| FOXO4 Rev                    | 5'-AGTTGAAGTCCAGTCCCTCG-3'                      |
| DYRK2 Fwd                    | 5'-ATTTACCTTCCGCAACCAC-3'                       |
| DYRK2 Rev                    | 5'-TCTCGGGCTTAAGGTCACAG-3'                      |
| PDCD4 Fwd                    | 5'-TGAGATTAAAGGGCTGGGCA-3'                      |
| PDCD4 Rev                    | 5'-ACCATCTCGACTCACTGCAA-3'                      |
| TGFBR3 Fwd                   | 5'-CACTTTCCTATCCCGCAAGC-3'                      |
| TGFBR3 Rev                   | 5'-TCAGGAGGCACACTTAGG-3'                        |
| $\beta$ -actin Fwd (RT-PCR)  | 5'-CTGGGACGACATGGAGAAAA-3'                      |
| $\beta$ -actin Rev (RT-PCR)  | 5'-AAGGAAGGCTGGAAGAGTGC-3'                      |

**Supplementary Table 2: Gene ontology analysis of up- and down-regulated genes (related with proliferation and progression) (miR-23a inhibitor group vs. the inhibitor NC group)****GO terms representing molecular function**

| GO ID      | Molecular function (GO description)                                                   | P-value    | Count |
|------------|---------------------------------------------------------------------------------------|------------|-------|
| GO:0046872 | Metal ion binding                                                                     | 2.2985E-10 | 641   |
| GO:0043167 | Ion binding                                                                           | 3.5099E-10 | 647   |
| GO:0043169 | Cation binding                                                                        | 4.1596E-10 | 645   |
| GO:0046914 | Transition metal ion binding                                                          | 6.0728E-8  | 400   |
| GO:0008270 | Zinc ion binding                                                                      | 9.3019E-7  | 350   |
| GO:0003824 | Catalytic activity                                                                    | 4.6267E-6  | 795   |
| GO:0003779 | Actin binding                                                                         | 2.3880E-5  | 72    |
| GO:0003707 | Steroid hormone receptor activity                                                     | 7.3615E-5  | 18    |
| GO:0016616 | Oxidoreductase activity, acting on the CH-OH group of donors, NAD or NADP as acceptor | 1.3530E-4  | 29    |
| GO:0008092 | Cytoskeletal protein binding                                                          | 1.4159E-4  | 100   |
| GO:0004879 | Ligand-dependent nuclear receptor activity                                            | 1.7433E-4  | 18    |
| GO:0005536 | Glucose binding                                                                       | 2.7339E-4  | 5     |
| GO:0004030 | Aldehyde dehydrogenase [NAD (P)+] activity                                            | 2.7339E-4  | 5     |
| GO:0055103 | Ligase regulator activity                                                             | 3.7146E-4  | 4     |
| GO:0055106 | Ubiquitin-protein ligase regulator activity                                           | 3.7146E-4  | 4     |
| GO:0048037 | Cofactor binding                                                                      | 4.0495E-4  | 55    |
| GO:0000267 | Cell fraction                                                                         | 1.7844E-4  | 186   |
| GO:0012505 | endomembrane                                                                          | 2.4886E-4  | 238   |
| GO:0043408 | Regulation of MAPKKK cascade                                                          | 1.6900E-4  | 40    |
| GO:0042175 | Nuclear membrane-endoplasmic reticulum network                                        | 2.7778E-4  | 115   |
| GO:0044432 | Endoplasmic reticulum part                                                            | 2.9438E-4  | 123   |
| GO:0031226 | Intrinsic to plasma membrane                                                          | 3.0069E-4  | 202   |
| GO:0071212 | Subsynaptic reticulum                                                                 | 3.4992E-4  | 128   |
| GO:0016323 | Basolateral plasma membrane                                                           | 4.2999E-4  | 46    |
| GO:0005792 | Microsome                                                                             | 4.3812E-4  | 52    |
| GO:0042598 | Vesicular fraction                                                                    | 4.9120E-4  | 53    |
| GO:0005887 | Integral to plasma membrane                                                           | 5.2630E-4  | 197   |
| GO:0005913 | Cell-cell adherens junction                                                           | 5.3520E-4  | 13    |
| GO:0045121 | Membrane raft                                                                         | 6.3833E-4  | 35    |
| GO:0005634 | nucleus                                                                               | 6.7338E-4  | 765   |

GO terms representing cellular compartment

| GO ID      | Cellular component (GO description)            | P-value    | Count |
|------------|------------------------------------------------|------------|-------|
| GO:0044424 | Intracellular part                             | 4.4221E-14 | 1624  |
| GO:0044464 | Cell part                                      | 4.3331E-10 | 2091  |
| GO:0005737 | Cytoplasm                                      | 1.8983E-9  | 1158  |
| GO:0043229 | Intracellular organelle                        | 1.2372E-8  | 1374  |
| GO:0043231 | Intracellular membrane-bounded organelle       | 3.3832E-8  | 1241  |
| GO:0045177 | Apical part of cell                            | 1.6175E-7  | 56    |
| GO:0004444 | Cytoplasmic part                               | 1.1638E-6  | 790   |
| GO:0044459 | Plasma membrane part                           | 1.6401E-6  | 338   |
| GO:0070161 | Anchoring junction                             | 1.5612E-5  | 151   |
| GO:0016328 | Lateral plasma membrane                        | 6.8643E-5  | 9     |
| GO:0005912 | Adherens junction                              | 7.0687E-5  | 35    |
| GO:0005624 | Membrane fraction                              | 7.6517E-6  | 145   |
| GO:0016324 | Apical plasma membrane                         | 1.0118E-4  | 40    |
| GO:0005911 | Cell-cell junction                             | 1.0917E-4  | 45    |
| GO:0005626 | Insoluble fraction                             | 1.5401E-4  | 148   |
| GO:0005789 | Endoplasmic reticulum membrane                 | 1.5702E-4  | 114   |
| GO:0005783 | Endoplasmic reticulum                          | 1.7164E-4  | 177   |
| GO:0000267 | Cell fraction                                  | 1.7844E-4  | 186   |
| GO:0012505 | endomembrane                                   | 2.4886E-4  | 238   |
| GO:0043408 | Regulation of MAPKKK cascade                   | 1.6900E-4  | 40    |
| GO:0042175 | Nuclear membrane-endoplasmic reticulum network | 2.7778E-4  | 115   |
| GO:0044432 | Endoplasmic reticulum part                     | 2.9438E-4  | 123   |
| GO:0031226 | Intrinsic to plasma membrane                   | 3.0069E-4  | 202   |
| GO:0071212 | Subsynaptic reticulum                          | 3.4992E-4  | 128   |
| GO:0016323 | Basolateral plasma membrane                    | 4.2999E-4  | 46    |
| GO:0005792 | Microsome                                      | 4.3812E-4  | 52    |
| GO:0042598 | Vesicular fraction                             | 4.9120E-4  | 53    |
| GO:0005887 | Integral to plasma membrane                    | 5.2630E-4  | 197   |
| GO:0005913 | Cell-cell adherens junction                    | 5.3520E-4  | 13    |
| GO:0045121 | Membrane raft                                  | 6.3833E-4  | 35    |
| GO:0005634 | nucleus                                        | 6.7338E-4  | 765   |
